## Specification of dopaminergic subsets involves interplay of En1 and Pitx3

**Jesse V. Veenliet, Maria T. M. Alves dos Santos, Willemieke M. Kouwenhoven, Lars von Oerthel, Jamie L. Lim, Annemarie J. A. van der Linden, Marian J. A. Groot Koerkamp, Frank C. P. Holstege and Marten P. Smidt**

There was an error published in *Development* **140**, 3373-3384.

On p. 3374, a section of the microarray analysis text should read as follows:

Analysis was performed as described (Roepman et al., 2005). Data were analyzed using ANOVA (R version 2.2.1/MAANOVA version 0.98-7) (Wu et al., 2003). Genes with  $P < 0.05$  after false discovery rate correction were considered to be significantly changed. Mouse Whole Genome Gene Expression Microarrays V1 (Agilent Technologies, Belgium) containing mouse 60-mer probes were used and data have been deposited in ArrayExpress under accession number E-TABM-1104.

The authors apologise to readers for this mistake.

# Specification of dopaminergic subsets involves interplay of En1 and Pitx3

Jesse V. Veenvliet<sup>1,\*</sup>, Maria T. M. Alves dos Santos<sup>2,\*</sup>, Willemieke M. Kouwenhoven<sup>1</sup>, Lars von Oerthel<sup>1</sup>, Jamie L. Lim<sup>2</sup>, Annemarie J. A. van der Linden<sup>1,2</sup>, Marian J. A. Groot Koerkamp<sup>3</sup>, Frank C. P. Holstege<sup>3</sup> and Marten P. Smidt<sup>1,‡</sup>

## SUMMARY

Mesodiencephalic dopaminergic (mdDA) neurons control locomotion and emotion and are affected in multiple psychiatric and neurodegenerative diseases, including Parkinson's disease (PD). The homeodomain transcription factor Pitx3 is pivotal in mdDA neuron development and loss of Pitx3 results in programming deficits in a rostralateral subpopulation of mdDA neurons destined to form the substantia nigra pars compacta (SNc), reminiscent of the specific cell loss observed in PD. We show here that in adult mice in which the gene encoding a second homeoprotein, engrailed 1 (En1), has been deleted, dramatic loss of mdDA neurons and striatal innervation defects were observed, partially reminiscent of defects observed in *Pitx3*<sup>-/-</sup> mice. We then continue to reveal developmental crosstalk between En1 and Pitx3 through genome-wide expression analysis. During development, both En1 and Pitx3 are required to induce expression of mdDA genes in the rostralateral subset destined to form the SNc. By contrast, Pitx3 and En1 reciprocally regulate a separate gene cluster, which includes *Cck*, demarcating a caudal mdDA subset in wild-type embryos. Whereas En1 is crucial for induction of this caudal phenotype, Pitx3 antagonizes it rostralaterally. The combinatorial action of En1 and Pitx3 is potentially realized through at least three levels of molecular interaction: (1) influencing each other's expression level, (2) releasing histone deacetylase-mediated repression of Nurr1 target genes and (3) modulating En1 activity through Pitx3-driven activation of En1 modulatory proteins. These findings show how two crucial mediators of mdDA neuronal development, En1 and Pitx3, interact in dopaminergic subset specification, the importance of which is exemplified by the specific vulnerability of the SNc found in PD.

**KEY WORDS:** Dopamine, Midbrain, Neurodegeneration, Substantia nigra, Transcription, Mouse

## INTRODUCTION

The pathological hallmark of Parkinson's disease (PD) is progressive neurodegeneration of the substantia nigra pars compacta (Barzilai and Melamed, 2003). Since cell replacement therapy was acknowledged as a viable treatment for PD, various neurodevelopmental studies have focused on the generation of a good cell replacement model (Arenas, 2010; Gaillard and Jaber, 2011; Toulouse and Sullivan, 2008; Kriks et al., 2011; Caiazzo et al., 2011). To obtain a protocol for successful differentiation of stem/inducible pluripotent cells into transplantable mesodiencephalic dopaminergic (mdDA) neurons that can functionally replace neurons degenerated in PD, detailed understanding of the transcriptional programs leading to generation of healthy mdDA neurons is necessary. Extensive efforts have been made in the last decade to identify signaling pathways and transcription factors crucial for mdDA development (Smidt and Burbach, 2007). A key factor in mdDA neuron development is the orphan nuclear receptor Nurr1 (Nr4a2). Nurr1 is essential for transcriptional activation of genes essential for dopamine (DA) signaling, such as tyrosine hydroxylase (*Th*), aromatic-L-amino acid decarboxylase (*Aadc*; *Ddc*) (Zetterström et al., 1997; Saucedo-Cardenas et al., 1998),

vesicular monoamine transporter 2 (*Vmat2*; *Slc18a2*), dopamine receptor D2 (*D2R*; *Drd2*) and dopamine transporter (*Dat*; *Slc6a3*) (Smits et al., 2003; Jacobs et al., 2009a). Whereas Nurr1 is essential for differentiation and survival of all mdDA neurons, the paired-like homeobox gene *Pitx3* is crucial only for the induction of a specific mdDA subpopulation that ultimately forms the SNc (Smidt et al., 2004; Smidt et al., 1997; Jacobs et al., 2007; Jacobs et al., 2011). *Pitx3* functions as an essential potentiator of Nurr1 in specification of the DA phenotype. *Pitx3* and Nurr1 occupy promoters of DA-related genes in concert and *Pitx3* releases histone deacetylase (HDAC)-mediated repression from the Nurr1 transcriptional complex (Jacobs et al., 2009a). We recently identified *Ahd2* (*Aldh1a1*) and *Cck* as novel *Pitx3* targets (Jacobs et al., 2007; Jacobs et al., 2011). Both are downregulated in *Nurr1*-deficient embryos but display differential dependence on *Pitx3*: whereas *Ahd2* is downregulated in *Pitx3*<sup>-/-</sup> embryos, *Cck* is upregulated (Jacobs et al., 2007; Jacobs et al., 2011; Wallén et al., 1999) and its expression expands into the rostralateral mdDA subpopulation. This expansion is accompanied by rostralateral upregulation of a second homeoprotein that is highly expressed during mdDA neuron development, engrailed 1 (En1) (Jacobs et al., 2011). In the brain, En1 expression is mainly restricted to the mid-hindbrain border (MHB) and is highly expressed by all mdDA neurons continuously from the moment they differentiate until adulthood (Simon et al., 2001). En1 is involved in mdDA survival and maintenance during development (Simon et al., 2003; Albéri et al., 2004) and complete deficiency of En1 results in a loss of hindbrain tissue with concomitant loss of most of the cerebellum (Wurst et al., 1994). To date, analyses have focused on the *En1/En2* double knockout, and a detailed mechanistic study of mdDA system development in *En1* single-null mutants has not been performed.

<sup>1</sup>Swammerdam Institute for Life Sciences, University of Amsterdam, Science Park 904, 3511 PG, Amsterdam, The Netherlands. <sup>2</sup>Rudolf Magnus Institute, Department of Neuroscience and Pharmacology, UMC Utrecht, Universiteitsweg 100, 3584 CG, Utrecht, The Netherlands. <sup>3</sup>Molecular Cancer Research, UMC Utrecht, Universiteitsweg 100, 3584 CG, Utrecht, The Netherlands.

\*These authors contributed equally to this work

‡Author for correspondence (m.p.smidt@uva.nl)

We aimed to fill this gap by detailed analysis of the role of En1 during terminal differentiation and specification of the mdDA area. We show that En1 induces *Nurr1* target genes during development (including *Th*, *Dat* and *Ahd2*) in a rostralateral subset of mdDA neurons, and that absence of En1 results in similar defects in this subset of neurons to those observed in *Pitx3*<sup>-/-</sup> embryos. Genome-wide expression analysis revealed that En1 and Pitx3 co-regulated, mostly in a reciprocal manner, various factors, including *Cck*, which marks a caudal subset of mdDA neurons. The caudal DA phenotype is induced by En1, but repressed by Pitx3 in the mdDA area position. En1-Pitx3 crosstalk might occur through at least three levels of molecular interaction: (1) influencing each others' expression, (2) releasing HDAC-mediated repression of *Nurr1* target genes and (3) modulating En1 activity through Pitx3-driven activation of En1 modulatory proteins that are expressed in specific subsets of the mdDA expression domain. Our data suggest that a delicate balance between transcriptional activity of the homeoproteins En1 and Pitx3 is crucial for the proper induction of distinct mdDA subsets.

## MATERIALS AND METHODS

### Animals

Adult *En1tm1Alj/J*<sup>+/-</sup> mice were backcrossed to the C57BL6/J line and then used in heterozygous breeding, generating *En1*<sup>+/+</sup> and *En1*<sup>-/-</sup> progeny. Embryos were collected at embryonic day (E)13.5 or E14.5 (E0.5 defined as day of copulatory plug). Genotyping was performed by PCR analysis using specific primers (Wurst et al., 1994).

*Pitx3*<sup>sgfp/sgfp</sup> and *Pitx3*<sup>sgfp/+</sup> littermate embryos were obtained as described previously (Jacobs et al., 2011; Zhao et al., 2004). *Pitx3*<sup>sgfp/+</sup> embryos are heterozygous for wild-type Pitx3 and green fluorescent protein (GFP), and have normal mdDA system development (Maxwell et al., 2005). *Pitx3*<sup>sgfp/sgfp</sup> mice are Pitx3 deficient. All procedures were according to and fully approved by the Dutch Ethical Committees for animal experimentation (UMC-U and UvA).

### Microarray analysis

RNA was isolated from dissected E13.5 *En1*<sup>-/-</sup> and *En1*<sup>+/+</sup> ventral midbrains (VMs). Microarray analysis was performed on four independent samples. Each experimental sample consisted of pooled RNA from three *En1*<sup>-/-</sup> VMs, which was hybridized to a reference pool consisting of RNA derived from ten *En1*<sup>+/+</sup> VMs. Analysis was performed as described (Roepman et al., 2005) using custom arrays containing mouse 70-mer oligonucleotides (Operon, Mouse V2 AROS). Data were analyzed using ANOVA (R version 2.2.1/MAANOVA version 0.98-7) (Wu et al., 2003). Genes with *P*<0.05 after false discovery rate correction were considered to be significantly changed. Data have been deposited in ArrayExpress under accession number E-TABM-711. Gene ontology (GO) analysis was performed using the BiNGO 2.44 plug-in (Cytoscape 2.8.2; Hypergeometric test; FDR correction; GO\_Biological\_Process; whole annotation as reference) with all En1-regulated genes as input.

### In situ hybridization (ISH)

ISH was performed as described (Smits et al., 2003). Digoxigenin-labeled probes for *Th*, *Vmat2*, *Cck*, *Dat*, *Nurr1*, *Aadc*, *Ahd2*, *Pitx3* and *Nts* have previously been described (Grima et al., 1985; Smits et al., 2003; Jacobs et al., 2011; Smits et al., 2004; Jacobs et al., 2007). Other probes used were: *Pbx1*, bp 1644-2277 of mouse coding sequence (CDS); *Pbx3*, bp 751-1803 of mouse CDS; *Tle3*, bp 1950-2928 of mouse CDS; *Tle4*, bp 2720-3514 of mouse CDS.

### Nissl staining

Sections (16 μm) were post-fixed in 4% paraformaldehyde (PFA) for 30 minutes, rinsed in PBS and then milli-Q water (mQ), and subsequently stained in 0.25% Cresyl Violet (+1% acetic acid) for 20 minutes. Sections were rinsed in mQ and 50% ethanol, differentiated in 70% and 96% ethanol, dehydrated in 100% ethanol, cleared in xylene and mounted with Entellan (Merck).

### Immunohistochemistry

Sections (16 μm) were post-fixed in 4% PFA for 30 minutes then DAB (3,3'-diamino-benzidine) staining was performed as described (Smidt et al., 2004).

### Cell culture and transfections followed by silver staining

MN9D cells were cultured and transfected as described previously (Jacobs et al., 2007). Cells were transfected with 0.5 μg of *En1*-pcDNA3.1(-)myc-His or an equal molar amount of empty pcDNA3.1(-)myc-His expression vector after which His-tagged proteins were purified using Ni-NTA magnetic agarose beads (Qiagen) according to the manufacturer's instructions. Purified proteins were separated by SDS-PAGE and visualized by protein gel silver staining as described previously (Jacobs et al., 2009a). Protein bands of interest were excised and subjected to nanoLC-ESI-MS mass spectrometry analysis (Proteome Factory).

### Immunoprecipitation (IP) and western blotting

MN9D-N13-cells were homogenized in lysis buffer and subjected to IP and western blot analysis as previously described (Jacobs et al., 2009a). Antibodies used were: anti-En1 (M04; abnova; 1 μg/ml); anti-En1 (ab32817; abcam; 1:2000); anti-PSF (Sfpq) (B92; Sigma; 1:2500); anti-His (ab9108; abcam; 1:20,000). Blots were incubated with SuperSignal and exposed to ECL films (Pierce).

### Explant culture

E13.5 *En1*<sup>-/-</sup> and *En1*<sup>+/+</sup> VMs were dissected, cultured as previously described (Jacobs et al., 2009a) and treated with 0.6 mM sodium butyrate (Sigma) or mock (ddH<sub>2</sub>O) for 48 hours, after which midbrains were homogenized and RNA extracted with Trizol (Invitrogen).

### Fluorescence-activated cell sorting (FACS)

Freshly dissected VMs were dissociated using a Papain dissociation system (Worthington). Cells were sorted on a Cytospeia Influx Cell sorter or BD FACS Aria III using previously described settings (Jacobs et al., 2011) and collected in Trizol-LS (Invitrogen).

### Quantitative PCR (qPCR)

Relative expression levels were determined by qPCR real-time PCR (Lightcycler) using the QuantiTect SYBR Green PCR LightCycler Kit (QIAGEN) according to the manufacturer's instructions. For each reaction, 25 ng (dissected midbrain) or 0.1 ng (FAC-sorted neurons) total RNA was used as input. Primer sequences are listed in supplementary material Table S5.

### Statistical analysis

Quantified qPCR results represent average values of experiments performed on 3-12 biological samples for each condition. Data indicate means with standard errors (s.e.m.). For array validation (Fig. 3B) and rostral versus caudal analysis (Fig. 1C,D; Fig. 8B), statistical analysis was performed by Student's *t*-test (one-way unpaired). Other qPCR experiments required multiple litters (Fig. 8D) or explant culture experiments (Fig. 7B-D) to obtain a sufficient sample size. We therefore stratified available embryos between conditions and corrected for inter-litter or inter-experimental variation using one-way ANCOVA with litter/experimental set as covariate. Measurements that differed by ≥2× standard deviations from the mean were excluded. \**P*≤0.05; \*\**P*≤0.01.

## RESULTS

### *Ahd2* and *Cck* mark distinct subsets during mdDA neuron development

*Pitx3*<sup>-/-</sup> embryos display mdDA neuron programming deficits in a rostralateral subpopulation that ultimately forms the SNc (Smidt et al., 2004; Nunes et al., 2003; Hwang et al., 2003; van den Munckhof et al., 2003). This subset is closely marked by *Ahd2* expression, which is lost in the absence of Pitx3 (Jacobs et al., 2007). We recently identified *Cck* as a novel Pitx3 target. *Cck* is upregulated in *Pitx3*<sup>-/-</sup> embryos (Jacobs et al., 2011) and its expression expands into the rostralateral subpopulation. We therefore hypothesized that *Ahd2* and *Cck* mark distinct mdDA subsets during normal mdDA

neuron development. Indeed, ISH on adjacent E14.5 wild-type sections revealed that *Ahd2* and *Cck* mark distinct mdDA domains (Fig. 1A). Whereas overlap between *Ahd2* and the DA neuron marker *Dat* was confined to a rostral subpopulation, *Cck* expression was restricted to caudal mdDA neurons. Interestingly, mediolateral *Cck* expression overlapped with that of *Dat*, whereas more medially *Dat* was strictly limited to the *Ahd2*+ mdDA domain (Fig. 1A). To confirm that *Ahd2* and *Cck* demarcate a rostral and caudal mdDA subpopulation, respectively, we microdissected VMs from *Pitx3<sup>gfp/+</sup>* embryos and separated the rostral from the caudal midbrain. Neurons from each area were dissociated, subjected to FAC-sorting and RNA was isolated to obtain mRNA from purified rostral and caudal mdDA neurons (Fig. 1B). qPCR confirmed enrichment of *Ahd2* in rostral mdDA neurons (Fig. 1C;  $P < 0.01$ ) and *Cck* enrichment in caudal mdDA neurons (Fig. 1D;  $P < 0.01$ ).

### Architecture of the mdDA area of adult *En1* knockout mice

We previously reported that upregulation and expansion of the *Cck* expression domain in *Pitx3<sup>-/-</sup>* embryos is accompanied by *En1*

upregulation (Jacobs et al., 2011). In analogy with the recent finding that the homeoprotein *Otx2* specifies neuron subtype identity in the ventral tegmental area (VTA) (Di Salvio et al., 2010), we set out to investigate whether the homeoproteins *Pitx3* and *En1* could act in a combinatorial code during dopaminergic subset specification, which ultimately gives rise to the distinct mdDA subpopulations outlined in Fig. 1.

As the adult *Pitx3* knockout phenotype is well described (Smidt et al., 2004; Nunes et al., 2003; Hwang et al., 2003; van den Munckhof et al., 2003), we next determined the adult *En1* knockout phenotype. Detailed characterization of the mdDA system in *En1* single-null mutant mice is lacking because previous studies have focused on deletion of one *En1* allele in a wild-type or *En2*-null background (Sgadò et al., 2006; Sonnier et al., 2007; Wurst et al., 1994; Alvarez-Fischer et al., 2011), leaving the role of *En1* in mdDA neuron development and subset specification undefined. Analysis of the mdDA area in *En1<sup>-/-</sup>* adult mice has been hampered because engineered null mutations lead to perinatal lethality accompanied by cerebellar deletion (Wurst et al., 1994). We circumvented this impediment by transferring the original *En1*-null allele from the 129/Sv strain to the C57BL/6J background, which suppresses the cerebellar phenotype (Bilovocky et al., 2003). C57BL/6J-*En1<sup>-/-</sup>* mice were born alive, smaller than littermates and displayed limb defects that are not suppressed in the C57BL/6J background (Bilovocky et al., 2003) (supplementary material Fig. S1). To analyze the DA system in these mice, we compared the distribution of *Th<sup>+</sup>* neurons in the mdDA area of 6-week-old *En1<sup>-/-</sup>*, *En1<sup>+/-</sup>* and wild-type littermates. A decrease of *Th<sup>+</sup>* DA neurons was observed in *En1<sup>+/-</sup>* mice in both SNc and VTA compared with wild type (Fig. 2A), indicating an early onset of the progressive DA cell loss that was previously documented at later stages in *En1<sup>+/-</sup>* mice (Sonnier et al., 2007). *En1<sup>-/-</sup>* mice displayed a dramatic decrease of *Th<sup>+</sup>* neurons in both SNc and VTA compared with wild-type and *En1<sup>+/-</sup>* mice (Fig. 2A). To determine whether mdDA neurons were absent in *En1<sup>-/-</sup>* mice or whether they no longer expressed *Th*, we performed Nissl staining on adjacent sections (Fig. 2B) and found a severe reduction of DA cell density in the VTA of *En1*-deficient mice. In the SNc, almost all DA neurons in the rostralateral part were absent, whereas more medially the density was reduced.

In the striatal projection area, *Th<sup>+</sup>* fibers were lost in the nucleus accumbens (Acb) and caudate putamen (Cpu) of *En1<sup>-/-</sup>* mice, although parts of the Cpu were still innervated. *En1<sup>+/-</sup>* mice displayed an intermediate phenotype (Fig. 2C). This phenotype is in striking contrast with the restricted connectivity observed in *Pitx3<sup>-/-</sup>* mice, in which *Th<sup>+</sup>* fibers are lost in the Cpu, whereas the Acb is still innervated (Smidt et al., 2004). Our data show that *En1* has a dose-dependent effect on the development and survival of mdDA neurons and specific innervation of the striatal projection area.

### Identification of *En1*-regulated genes in *En1*-deficient embryos

In *Pitx3<sup>-/-</sup>* mice, malformation of the adult mdDA system is preceded by developmental failure of mdDA neurons (Smidt et al., 2004). To study the role of *En1* during mdDA neuron development, we performed genome-wide expression analysis of E13.5 *En1<sup>-/-</sup>* versus *En1<sup>+/+</sup>* dissected VMs. Microarray analysis (MAANOVA-FDR) revealed 204 significantly regulated genes (supplementary material Tables S1, S2). Gene ontology analysis (Fig. 3A) revealed the biological processes affected in *En1<sup>-/-</sup>* embryos, including neurogenesis, neural development, chromatin organization, axonogenesis, axon guidance, neuron migration, Wnt receptor

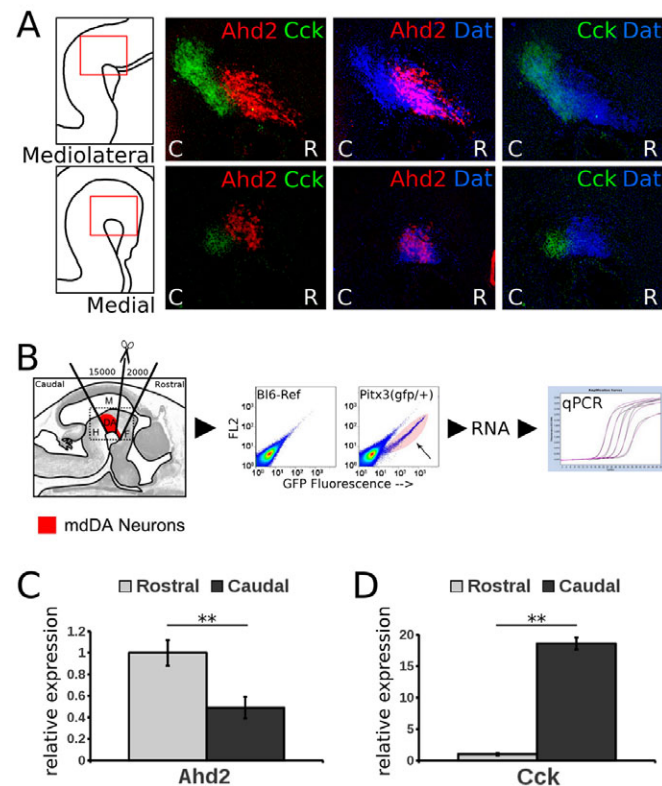

**Fig. 1. *Ahd2* and *Cck* mark distinct dopaminergic subsets during mdDA neuron development.** (A) Pseudo-overlays of adjacent sections (section planes indicated by red box in mdDA schematics) stained for *Ahd2*, *Cck* and *Dat* show that expression of *Cck* and *Ahd2* is mutually exclusive and mark a caudal and rostralateral subset, respectively. C, caudal; R, rostral. (B) E14.5 *Pitx3<sup>gfp/+</sup>* midbrains were microdissected and separated into a rostral and caudal part. Neurons were dissociated and subjected to FACS to obtain a purified DA neuron population [GFP+, indicated by black arrow, compare with Bi6-Ref (control wild-type midbrain)]. Caudal mdDA:  $\pm 15,000$  GFP+ cells; Rostral mdDA:  $\pm 2000$  GFP+ cells. RNA was then isolated and subjected to qPCR. F, forebrain; H, hindbrain; M, midbrain. (C,D) qPCR confirmed rostral enrichment of *Ahd2* (C) and caudal enrichment of *Cck* (D). *18S* expression was unchanged ( $P = 0.98$ ), and served to normalize for amount of input RNA. \*\* $P < 0.01$ ;  $n = 5$ . Error bars represent s.e.m.

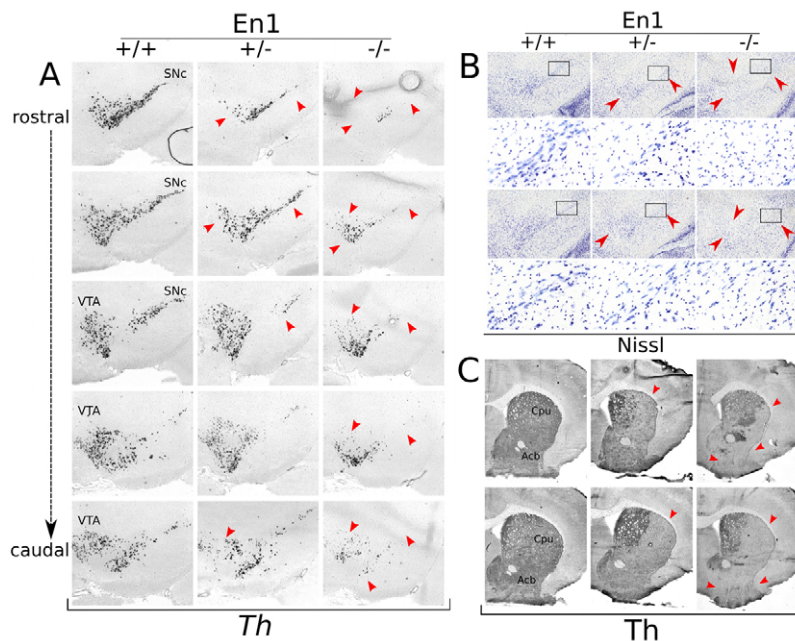

**Fig. 2. The architecture of the mdDA area and striatal projections are affected in *En1*<sup>-/-</sup> adult mice.** (A) *Th* expression in coronal sections of the mdDA neuronal region. *Th* expression in the substantia nigra pars compacta (SNc) and the ventral tegmental area (VTA) is mildly affected in *En1*<sup>+/-</sup> and severely affected in *En1*<sup>-/-</sup> adult mice (red arrowheads). (B) Nissl staining in adjacent sections revealed decreased DA cell density in both rostralateral and medial parts of the SNc in *En1*<sup>+/-</sup> and *En1*<sup>-/-</sup> mice in a dose-dependent manner (indicated by red arrowheads). High magnification images of the boxed areas are shown. (C) Coronal sections of the striatal projection area stained for *Th* protein show innervation defects (red arrowheads) of caudate putamen (Cpu) and nucleus accumbens (Acb) in *En1*<sup>-/-</sup> mice compared with wild type, with the *En1*<sup>+/-</sup> displaying an intermediate phenotype.

signaling pathway, apoptosis, retinoic acid metabolic process and midbrain/diencephalon/hindbrain development.

Most importantly, key genes in DA metabolism, *Th*, *Dat* and *Aadc*, were identified as novel transcriptional targets of *En1* (downregulated in *En1*<sup>-/-</sup> embryos; supplementary material Table S2). For validation, we subjected RNA from a separate set of dissected E13.5 *En1*<sup>+/+</sup> and *En1*<sup>-/-</sup> VMs to qPCR and confirmed downregulation of *Dat*, *Th* and *Cck* ( $P < 0.01$ ) (Fig. 3B). *Aadc*

expression was not significantly reduced in this dataset, but local downregulation was confirmed in independent ISH and qPCR experiments (Fig. 4C,F; Fig. 7D). Importantly, unaffected transcript levels of the housekeeping gene *18s* (*Rn18s*) and the DA neuron marker gene *Nurr1* (Fig. 3B), in combination with an unaffected *Nurr1* expression domain (Fig. 5C,D) indicate that reduced expression of DA-related genes represents programming deficits rather than cell loss at this stage.

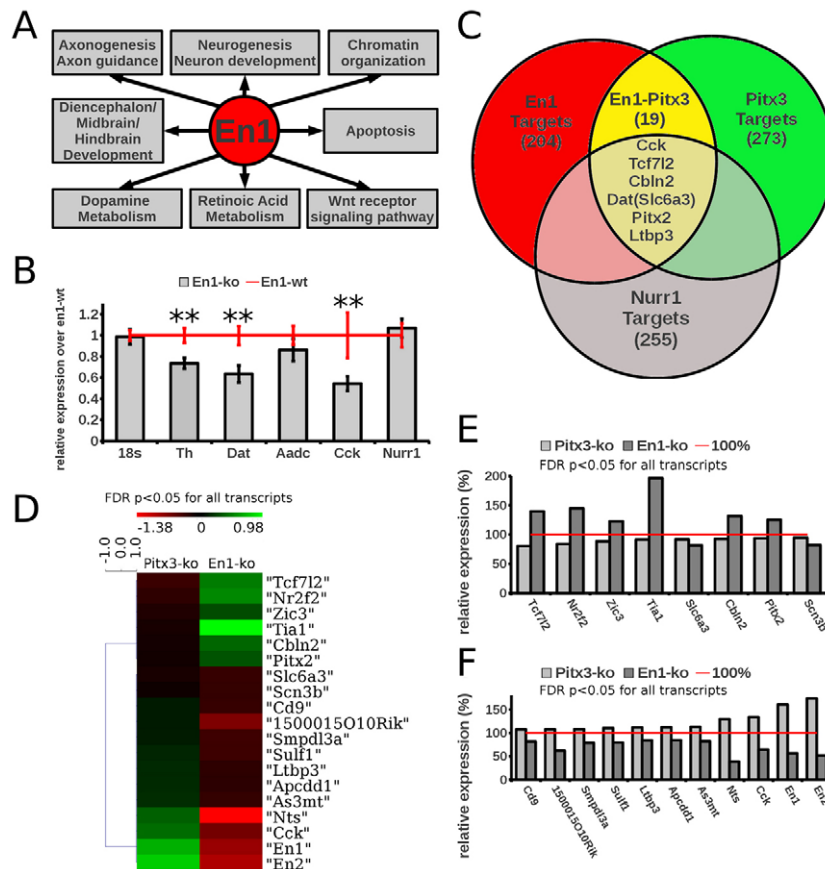

**Fig. 3. In vivo genome-wide expression analysis reveals crosstalk between the homeoproteins *En1* and *Pitx3*.** (A) GO analysis identified a key role for *En1* in multiple biological processes during mdDA development. (B) qPCR analysis confirmed downregulation of key DA-related genes in *En1*<sup>-/-</sup> embryos (wild type,  $n=3$ ; knockout,  $n=5$ ; \*\* $P \leq 0.01$ ). *18s* expression was unchanged ( $P=0.89$ ), and served to normalize for amount of input RNA. Red line indicates relative wild-type expression. Error bars represent s.e.m. (C) Venn diagram of MAANOVA-FDR-corrected lists of genes affected in *Nurr1*<sup>-</sup>, *Pitx3*<sup>-</sup> and *En1*<sup>-</sup> deficient embryos revealed genes co-regulated by *En1*, *Pitx3* and *Nurr1*. (D) Heatmap generated by hierarchical clustering (MeV v4.7.3) of genes that are significantly regulated (MAANOVA-FDR) in both *Pitx3*<sup>-/-</sup> and *En1*<sup>-/-</sup> embryos. Color scale bar represents relative expression [ $M\text{-value} = 2\log(\text{fold-change})$ ; green, upregulation; red, downregulation]. (E) Whereas *Dat* (*Slc6a3*) and *Scn3b* are downregulated in both *Pitx3*<sup>-/-</sup> and *En1*<sup>-/-</sup> embryos, most genes downregulated in *Pitx3*<sup>-/-</sup> embryos are upregulated in *En1*<sup>-/-</sup> embryos. (F) Genes downregulated in *En1*<sup>-/-</sup> embryos are upregulated in *Pitx3*<sup>-/-</sup> embryos. Red lines in E,F indicate relative wild-type expression.

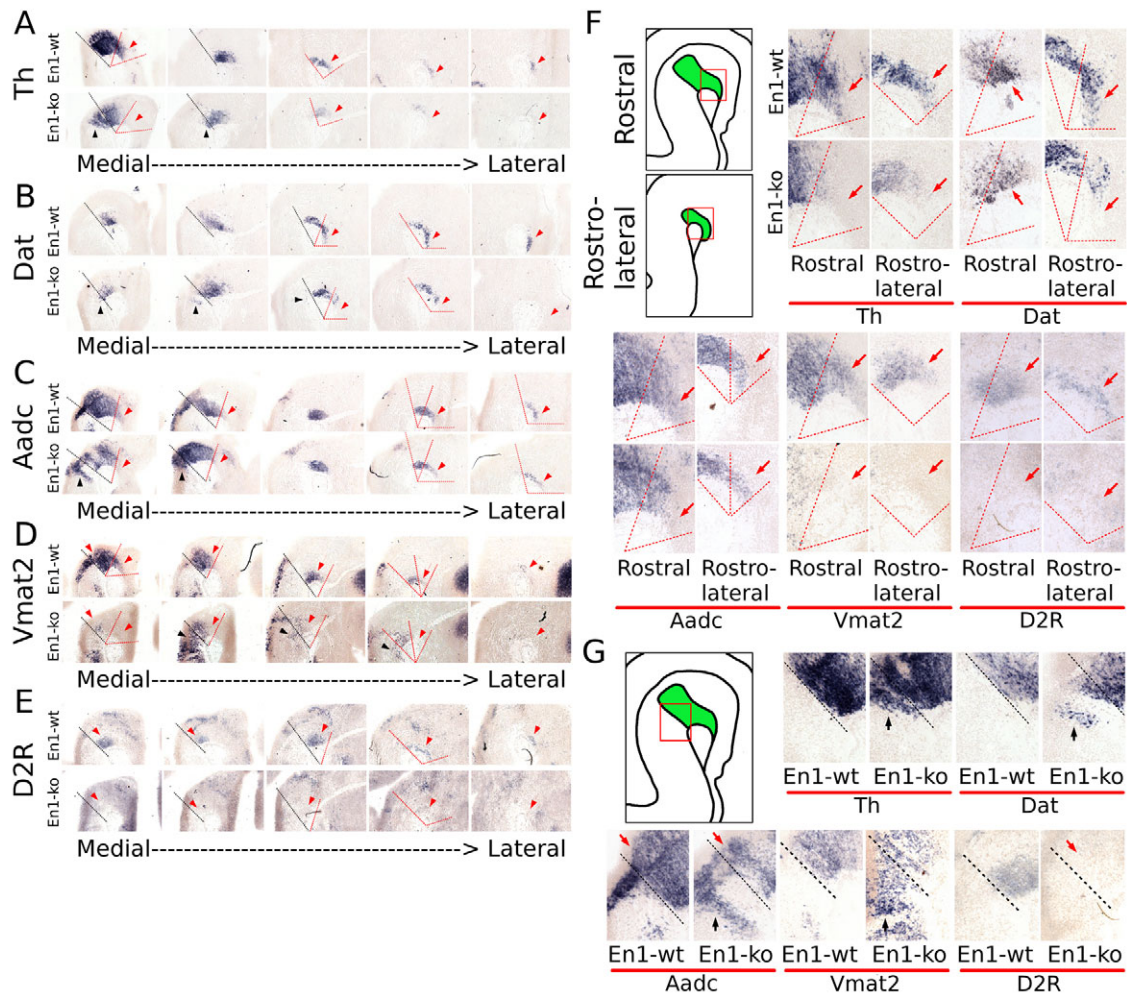

**Fig. 4. Nurr1 and *Pitx3* target genes are downregulated in the mdDA area, but ectopically expressed in the metencephalic area in *En1*<sup>-/-</sup> embryos.** (A-E) The dopaminergic markers *Th* (A) and *Dat* (B) are downregulated in *En1*<sup>-/-</sup> embryos. The affected rostralateral subset is demarcated by red dotted lines and indicated by red arrowheads. The Nurr1 target gene *Aadc* is downregulated in both rostralateral (C; demarcated by red dotted lines, indicated by red arrowhead) and caudal (G; red arrow in front of black dotted line) DA neurons. The Nurr1 and *Pitx3* target genes *Vmat2* (D) and *D2R* (E) are downregulated throughout the whole mdDA area in *En1*<sup>-/-</sup> embryos (red arrowheads). *Th*, *Dat*, *Vmat2* and *Aadc* all display ectopic expression in the metencephalon of *En1*<sup>-/-</sup> embryos (A-D), indicated by black arrowheads (MHB indicated by black dotted line). (F) Higher magnifications of the affected rostralateral area (red box in mdDA schematics; whole mdDA area in green). The rostralateral population is demarcated by red dotted lines, affected areas indicated by red arrows. (G) Higher magnifications of caudal area (red box in mdDA schematic; whole mdDA area in green) showing expansion of DA-related genes (except *D2R*) behind the MHB (black dotted line, affected area indicated by black arrows).

### ***En1* and *Pitx3* crosstalk in the regulation of Nurr1 target genes**

Downregulation of the Nurr1-target genes *Dat* and *Th* (Saucedo-Cardenas et al., 1998) in *En1*<sup>-/-</sup> embryos is reminiscent of the phenotype in *Pitx3*<sup>-/-</sup> embryos (Jacobs et al., 2011), providing further evidence for *En1*-*Pitx3* interplay. To identify genes regulated by both homeoproteins, we performed an overlay of transcripts regulated in *En1*<sup>-/-</sup> embryos with the MAANOVA-FDR analysis of genes regulated in *Pitx3*<sup>-/-</sup> embryos (Jacobs et al., 2011) (supplementary material Tables S3, S4). This analysis identified 19 genes that are regulated by both *Pitx3* and *En1*, six of which were previously identified as Nurr1 target genes (Jacobs et al., 2009b; Jacobs et al., 2011) (Fig. 3C). Strikingly, only two of these genes were regulated in the same direction in both *En1* and *Pitx3* knockout embryos (including *Dat*). All other genes were reciprocally regulated: genes downregulated in *En1*<sup>-/-</sup> embryos were upregulated in *Pitx3*<sup>-/-</sup> embryos and vice versa (Fig. 3D-F).

### ***En1*-deficient embryos fail to induce the dopaminergic phenotype in a rostralateral mdDA subset**

Analysis of *Pitx3*<sup>-/-</sup> mice identified mdDA subsets that are differentially dependent on *Pitx3* (Smits et al., 2006; Jacobs et al., 2007; Jacobs et al., 2011). To determine whether *En1* deficiency affects Nurr1 target gene expression in a subset-specific manner, we performed ISH on E14.5 *En1*<sup>-/-</sup> embryos and wild-type littermates. *Th* and *Dat* expression was downregulated in the rostralateral mdDA system, but relatively unaffected in the mediocaudal part of the midbrain (Fig. 4A,B,F). *Aadc* expression was subtly affected throughout the whole mdDA area in *En1*-deficient embryos (Fig. 4C,F). *Vmat2* and *D2R* were not identified by microarray analysis as *En1* target genes, but their expression is downregulated in *Nurr1* and *Pitx3* knockout embryos (Jacobs et al., 2009a; Smits et al., 2003). We therefore analyzed *En1*<sup>-/-</sup> embryos and found a reduction of *Vmat2* and *D2R* expression (Fig. 3D-F).

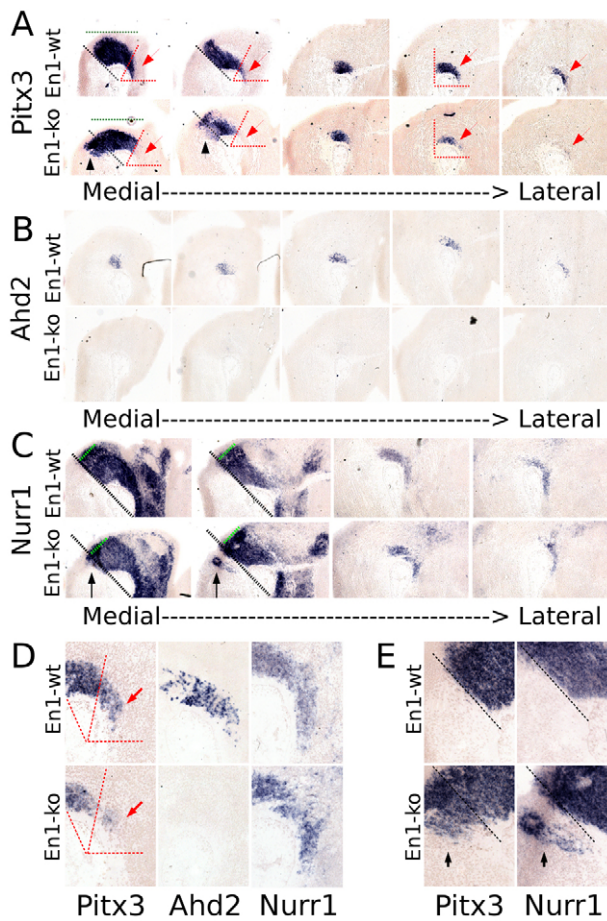

**Fig. 5. Severe downregulation of *Pitx3* and *Ahd2* expression in a rostralateral subset of mdDA neurons in *En1*<sup>-/-</sup> embryos.**

(A,B) Downregulation of *Pitx3* (A, affected areas demarcated by red dotted lines and indicated by red arrowheads) and complete absence of *Ahd2* (B) in *En1*<sup>-/-</sup> embryos. (C) *Nurr1* expression is unaffected. (D) Higher magnifications of the rostralateral mdDA population where expression of *Pitx3* (red arrows) and *Ahd2* is severely affected. (E) Higher magnification images show that *Pitx3* (see also A) and *Nurr1* (see also C) are ectopically expressed in the *En1*<sup>-/-</sup> metencephalon. Expansion is indicated by black arrows; black dotted lines in A-C and E indicate position of the MHB in wild type.

Interestingly, all analyzed DA-related genes except *D2R* displayed caudal expansion of their domain in more medial sections, with expression of *Th*, *Dat*, *Aadc* and *Vmat2* behind the MHB (Fig. 4A-D,G, black dotted line).

The rostralateral defect observed in *En1*<sup>-/-</sup> embryos is highly reminiscent of the phenotype in *Pitx3*<sup>-/-</sup> embryos (Jacobs et al., 2011; Jacobs et al., 2007). We therefore analyzed *Pitx3* expression in *En1*<sup>-/-</sup> embryos and observed a downregulation in the rostralateral mdDA area (Fig. 5A,F). As this subset is closely marked by the expression of *Ahd2*, a direct transcriptional target of *Pitx3* (Jacobs et al., 2007), we analyzed *Ahd2* expression in *En1*<sup>+/+</sup> and *En1*<sup>-/-</sup> embryos by ISH and observed complete loss of *Ahd2* transcript in *En1*-deficient embryos (Fig. 5B,F). The unaffected expression of the early post-mitotic mdDA precursor marker *Nurr1* (Smidt and Burbach, 2007) in this population (Fig. 5C,D) indicates that the absence of DA neuron marker expression within this area is not the result of neuronal loss or *Nurr1* transcriptional activity, but a direct consequence of *En1*- or *Pitx3*-driven programming defects.

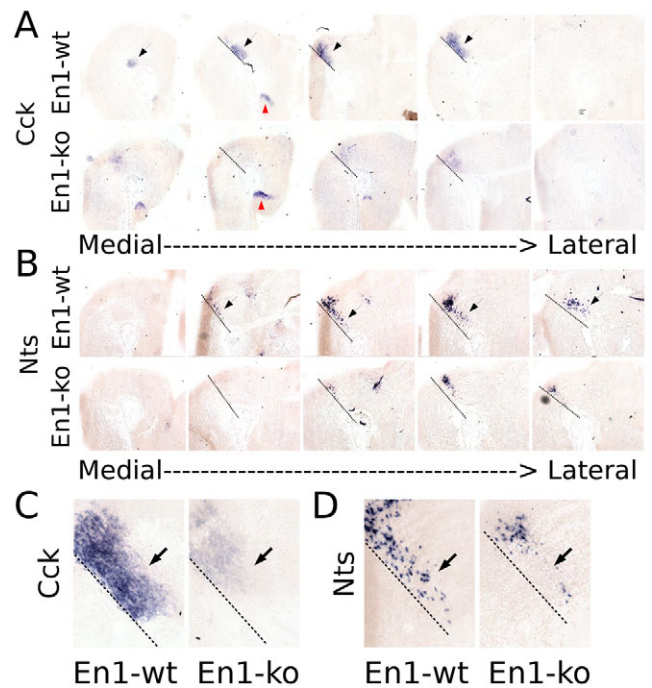

**Fig. 6. The caudal subset marker *Cck*, upregulated in *Pitx3*-deficient embryos, is severely downregulated in *En1*<sup>-/-</sup> embryos.** (A,C) *Cck* expression is restricted to the caudal mdDA area in wild-type embryos and downregulated in the absence of *En1* (A; higher magnification in C). Affected area indicated by black arrows; red arrowheads in A mark a small area of *Cck*+ cells outside the mdDA area). (B,D) *Nts*, which is upregulated in *Pitx3*<sup>-/-</sup> embryos (Fig. 3D), is restricted to the caudal mdDA area in wild type (black arrowheads in B), and downregulated in *En1*<sup>-/-</sup> embryos (B; higher magnification in D; affected area indicated by black arrows). For both *Nts* and *Cck*, no metencephalic expansion was observed behind the MHB (black dotted line in A-D).

To strengthen this hypothesis, we analyzed the expression of *Nurr1* and the mdDA progenitor marker *Lmx1a* (Smidt and Burbach, 2007) in *En1*<sup>-/-</sup> and *En1*<sup>+/+</sup> at E12.5 and observed no differences in the distribution of either marker (supplementary material Fig. S2A,B), suggesting that the identity of mdDA progenitors and early post-mitotic neurons is not affected in the absence of *En1*.

Notably, both *Nurr1* and *Pitx3* were ectopically expressed behind the MHB (Fig. 5A,C,E, black dotted line), suggesting that the metencephalic expansion of the DA phenotype (Fig. 4A-D,G) is caused by ectopic expression of *Pitx3* and *Nurr1*.

### Caudal subset-restricted genes *Cck* and *Nts* are downregulated in *En1*-deficient embryos

*Cck* marks a caudal subpopulation of the mdDA area that is not affected in *Pitx3*<sup>-/-</sup> embryos and is destined to form the VTA (Fig. 1). *Pitx3* loss leads to upregulation and rostralateral expansion of *Cck* (Jacobs et al., 2011). By contrast, our microarray and qPCR data showed downregulation of *Cck* in *En1*<sup>-/-</sup> embryos (Fig. 3). Indeed, ISH revealed severe downregulation of *Cck* in the caudal mdDA area of *En1*<sup>-/-</sup> embryos (Fig. 6A,C). *Nts* is also downregulated in the absence of *En1* but upregulated in *Pitx3*<sup>-/-</sup> embryos (Fig. 3). Like *Cck*, *Nts* expression was restricted to the caudal mdDA system in wild type and downregulated within this area in *En1*<sup>-/-</sup> embryos (Fig. 6B,D). Thus, in contrast to *Th*, *Dat* and *Vmat2*, expression of which is similarly affected in the rostralateral

mdDA in *En1*<sup>-/-</sup> and *Pitx3*<sup>-/-</sup> embryos, the caudally restricted factors *Cck* and *Nts* are reciprocally regulated by *Pitx3* and *En1*.

### En1 releases HDAC-mediated repression of Nurr1 target genes

We recently reported that *Pitx3* releases HDAC-mediated repression of *Nurr1* target genes and showed that treatment with the non-specific HDAC inhibitor sodium butyrate (NaB) fully restores *Th* transcript levels in *Pitx3*-deficient *Pitx3*<sup>gfp/-</sup> embryos (Jacobs et al., 2009a).

Given the striking similarity in the rostralateral phenotype of *Pitx3*- and *En1*-deficient embryos, we tested whether HDAC-inhibition in *En1*-deficient mdDA neurons could re-activate *Nurr1* target genes. We treated explant cultures of E13.5 *En1*<sup>+/+</sup> and *En1*<sup>-/-</sup> VMs with NaB for 48 hours then subjected isolated RNA to qPCR (Fig. 7A). Relative expression levels were normalized to *Tbpl*, for which no change was observed (data not shown). In *En1*<sup>+/+</sup> midbrains, the relative amounts (untreated relative to treated) of *Th* and *Cck* transcripts were unchanged upon NaB treatment (Fig. 7B,C). In agreement with the *in vivo* expression analysis (Fig. 3), *Aadc*, *Th* and *Cck* were downregulated in mock-treated *En1*<sup>-/-</sup> midbrains (Fig. 7B-D). Strikingly, treatment of *En1*<sup>-/-</sup> midbrains with NaB significantly increased *Th* expression, restoring levels to 100% upon treatment (Fig. 7B; *P*<0.05). A smaller, but significant, increase of *Cck* transcript was detected (Fig. 7C; *P*<0.05). For *Aadc*, a non-significant decrease in wild-type midbrains upon NaB treatment was observed, reducing transcript levels to *En1*<sup>-/-</sup> values (Fig. 7D; *P*=0.07). These data demonstrate that release of HDAC-mediated repression in *En1*<sup>-/-</sup> embryos completely restores *Th* expression, bypassing the requirement for *En1*.

Release of HDAC-mediated repression and subsequent activation of *Nurr1* target genes by *Pitx3* might be mediated by recruitment to the *Nurr1*-PSF transcriptional complex, given the direct interaction of the transcriptional co-repressor PSF with both *Nurr1* and *Pitx3* (Jacobs et al., 2009a). We therefore tested whether *En1*, like *Pitx3*, could physically interact with the *Nurr1*-PSF complex (Fig. 7E). We affinity purified *En1*-interacting proteins by using an *En1*-His fusion protein as bait on a His-column purification set-up. *En1*-His protein or His protein alone (control) was overexpressed in DA MN9D cells, total lysates were subjected to nickel bead columns and the eluate was isolated for analysis (Fig. 7F,G). SDS-PAGE and subsequent silver staining revealed a specific differential band in the *En1*-His purified sample positioned just above the 95 kDa marker that was identified by mass spectrometry as PSF (Fig. 7H). For validation, we overexpressed *En1* or empty vector (control) in MN9D cells, immunoprecipitated with an *En1* antibody and confirmed that PSF physically interacts with *En1* (Fig. 7I), suggesting that both *En1* and *Pitx3* release HDAC-mediated repression of *Nurr1* target genes by recruitment of the *Nurr1*-PSF transcriptional complex (Jacobs et al., 2009a).

### Pitx3 regulates En1 modulatory proteins

As a third possible mechanism of *En1*-*Pitx3* interplay, we hypothesized that *Pitx3* regulates the transcription of genes encoding proteins that modulate *En1* transcriptional activity. Candidates are Groucho (Grg/Tle) and Pbx family members that bind Engrailed Homology (Eh) domains and modulate *En1* transcriptional activity (Serrano and Maschat, 1998; Peltenburg and Murre, 1996; Dasen et al., 2001). ISH analysis in E14.5 wild-

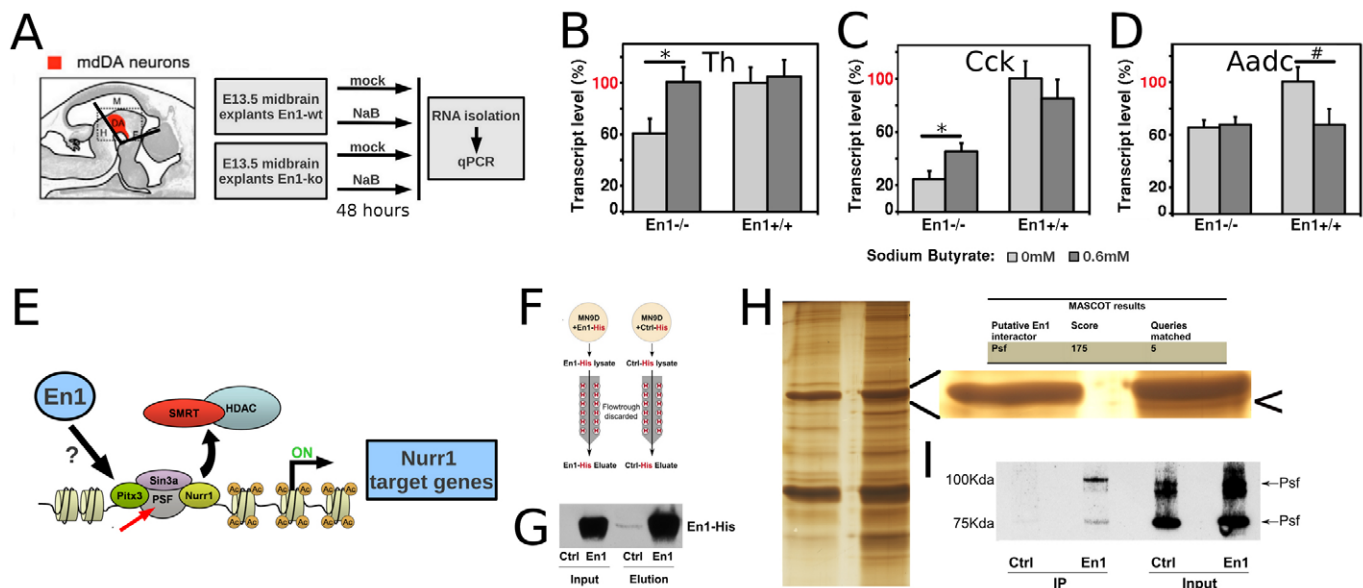

**Fig. 7. Interference with HDAC-mediated repression in *En1*-deficient midbrains restores *Th* and *Cck* expression.** (A) Microdissected littermate *En1*<sup>+/+</sup> and *En1*<sup>-/-</sup> midbrains (area between black lines) were treated with the HDAC inhibitor (HDACi) sodium butyrate (NaB) or ddH<sub>2</sub>O (mock control) for 48 hours. mRNA was then isolated and subjected to qPCR (*n*=5-7). F, forebrain; H, hindbrain; M, midbrain. (B) Strikingly, *Th* expression, decreased in *En1*<sup>-/-</sup> embryos, was completely restored by NaB (*P*=0.045), whereas expression in *En1*<sup>+/+</sup> embryos was not affected by treatment (*P*=0.789). (C) Likewise, *Cck* expression was upregulated by HDACi treatment in *En1*<sup>-/-</sup> (*P*=0.046) but not in wild-type embryos (*P*=0.447). NaB treatment did not restore *Aadc* expression (*P*=0.779), but a non-significant decrease of expression by HDACi was observed in wild type (*P*=0.074) (D). \**P*<0.05; #*P*=0.07. (E) Jacobs et al. (Jacobs et al., 2009a) proposed that *Pitx3* releases HDAC-mediated repression of *Nurr1* target genes by recruitment to the *Nurr1*-PSF transcriptional complex. Re-activation of *Nurr1* target genes upon HDAC inhibition in *En1*<sup>-/-</sup> embryos suggests that *En1* mediates transcription of *Nurr1* target genes in a similar manner. (F-H) His-tag based affinity purification [experimental set-up in F, successful pull-down of *En1*-His confirmed by immunoblotting (G)] with subsequent silver-staining (H) revealed a 95 kDa protein band (black arrowhead) that specifically interacts with *En1*-His and was identified as PSF by mass-spectrometry (MASCOT). (I) Specific *En1*-PSF interaction was confirmed by IP of *En1* and subsequent detection of PSF. Ctrl, pre-immune serum control. Error bars represent s.e.m.



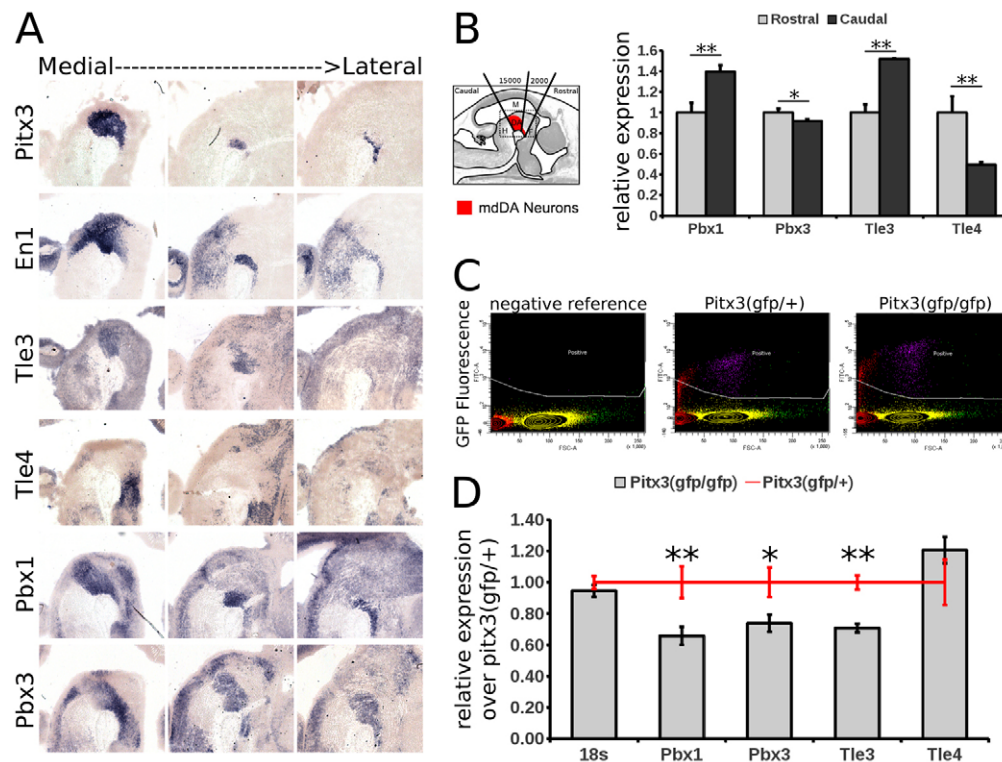

**Fig. 8. Transcripts of *Pbx1*, *Pbx3* and *Tle3*, encoding *En1*-modulating proteins, are downregulated in *Pitx3*-deficient embryos. (A) ISH analysis of the mdDA area of E14.5 wild-type embryos. *Pbx1*, *Pbx3* and *Tle3* are clearly expressed within the *En1* and *Pitx3* mdDA expression domain. *Tle4* is restricted to the most rostral tip of the *Pitx3* domain. Medially, *Tle3* is restricted to the caudal mdDA area and *Pbx3* seems to be enriched rostrally. (B) qPCR analysis on FAC-sorted rostral and caudal mdDA neurons revealed enriched *Pbx1* and *Tle3* expression within the caudal mdDA area. *Tle4* and *Pbx3* level is increased in the rostral mdDA domain. *18S* expression was unchanged ( $P=0.98$ ; served to normalize for amount of input RNA).  $*P<0.05$ ;  $**P<0.01$ .  $n=5$ . F, forebrain; H, hindbrain; M, midbrain. (C) The FACS-gate was set to select GFP-positive mdDA neurons from E14.5 *Pitx3*<sup>gfp/+</sup> (heterozygous) and *Pitx3*<sup>gfp/gfp</sup> (knockout) embryos. Purple, GFP-positive single cells (collected in Trizol-LS); green, doublets; red, debris. (D) qPCR revealed significant ( $*P<0.05$ ;  $**P=0.01$ ) downregulation in the *Pitx3* knockout of *Pbx1*, *Pbx3* and *Tle3*. *Tle4* transcript level appeared unchanged ( $P=0.24$ ). *18S* expression was unchanged and served to normalize for amount of input RNA. Red line indicates relative wild-type expression. *Pitx3*<sup>gfp/+</sup>,  $n=4$ ; *Pitx3*<sup>gfp/gfp</sup>,  $n=12$ . Error bars represent s.e.m.**

type embryos revealed clear *Pbx1*, *Pbx3* and *Tle3* expression in the *En1* and *Pitx3* mdDA expression domain, whereas *Tle4* expression was restricted to the most rostral tip of the *Pitx3* expression domain (Fig. 8A). To verify subset-specific expression of *Pbx1*, *Pbx3*, *Tle3* and/or *Tle4*, we subjected rostral and caudal FAC-sorted mdDA neurons to qPCR and found clear enrichment of *Pbx1* and *Tle3* expression within caudal mdDA neurons (Fig. 8B;  $P<0.01$ ). For *Tle3*, this caudal restriction was clearly visible in, and confined to, medial sections (Fig. 8A). Transcript levels of both *Pbx3* and *Tle4* were higher in rostral compared with caudal mdDA neurons ( $P=0.02$  for *Tle4*;  $P=0.04$  for *Pbx3*). Rostral enrichment of *Pbx3* was relatively small, but was clearly observed in medial sections (Fig. 8A). We continued to analyze whether *Pbx1*, *Pbx3*, *Tle3* and *Tle4* were regulated by *Pitx3*. To test this, we microdissected E14.5 *Pitx3*<sup>gfp/+</sup> (heterozygous) and *Pitx3*<sup>gfp/gfp</sup> (knockout) VMs, sorted GFP-positive cells by FACS, and subjected isolated RNA to qPCR (Fig. 8C). *Pbx1* ( $P=0.01$ ), *Pbx3* ( $P=0.03$ ) and *Tle3* ( $P=0.01$ ) transcript levels were significantly reduced, whereas expression of *Tle4* and the housekeeper gene *18s* appeared unchanged in *Pitx3*<sup>gfp/gfp</sup> embryos (Fig. 8D). To determine in which mdDA domains expression of *Pbx1/3* and *Tle3* was affected in *Pitx3*<sup>gfp/gfp</sup> embryos, we analyzed wild-type, *Pitx3*<sup>gfp/+</sup> and *Pitx3*<sup>gfp/gfp</sup> embryos at E14.5 by ISH. *Pbx1* expression was decreased throughout the mdDA area, in particular dorsomedially and rostralaterally (supplementary material

Fig. S3A). Notably, in lateral sections *Pbx1* expression appeared lower in *Pitx3*<sup>gfp/+</sup> compared with *Pitx3*<sup>+/+</sup> embryos (supplementary material Fig. S3A). For *Tle3*, similar defects were observed, as expression appeared to be abolished in both the dorsomedial and rostralateral mdDA domains of *Pitx3*<sup>gfp/gfp</sup> embryos (supplementary material Fig. S3C). In agreement with the smaller effect size observed by qPCR, *Pbx3* expression was less clearly affected in *Pitx3*<sup>gfp/gfp</sup> embryos, although small defects in the distribution of *Pbx3* could be observed in lateral sections (supplementary material Fig. S3B). Altogether, these data suggest that *Pitx3* activates *Pbx1*, *Pbx3* and *Tle3* and might thereby modulate *En1* activity.

## DISCUSSION

Despite extensive efforts to identify signaling pathways and transcription factors that are crucial for mdDA development (Smid and Burbach, 2007; Van den Heuvel and Pasterkamp, 2008), our understanding of transcriptional programs leading to healthy mdDA neuron generation is still in its infancy. Of particular interest are the transcriptional cascades underlying differential programming of the VTA and SNc, because insight into molecular differences might improve our understanding of the specific vulnerability of the SNc to neurodegeneration as observed in PD. Here, we show how combinatorial action of *Pitx3* and *En1* might induce dopaminergic subset specification.

### *Ahd2* and *Cck* mark dopaminergic subsets that display differential dependence on *En1* and *Pitx3*

In the rostralateral mdDA area, expression of *Nurr1* target genes is abolished in the absence of *En1*. This phenotype is reminiscent of *Pitx3*<sup>-/-</sup> embryos, in which the same neuronal subset, marked by *Ahd2* expression and destined to form the SNc, fails to express key DA-related genes (Jacobs et al., 2011). Thus, our data position *En1* next to *Pitx3* as a crucial inducer of the rostralateral mdDA phenotype. Although *Pitx3* expression is affected in *En1*<sup>-/-</sup> embryos, the phenotype of *En1*<sup>-/-</sup> and *Pitx3*<sup>-/-</sup> embryos is not identical. *Aadc* is affected in *En1*<sup>-/-</sup> but not in *Pitx3*<sup>-/-</sup> embryos (Jacobs et al., 2009a), and *Pitx3*<sup>-/-</sup> embryos display *Cck* expansion into the rostralateral mdDA population (Jacobs et al., 2011), whereas in *En1*<sup>-/-</sup> embryos loss of *Pitx3* in this subset does not induce ectopic *Cck* expression. Thus, the relationship between *En1* and *Pitx3* in terminal mdDA neuron differentiation cannot be explained by a simple model placing *Pitx3* under the transcriptional control of *En1*.

*En1* is crucial for correct molecular specification of a second subset, marked by *Cck*. In this subset, *Pitx3* and *En1* seem to

compensate for each others' absence partially in the induction of *Dat*, *Th*, *Vmat2* and *Aadc* as their expression is affected but not abolished in this area in both *En1*- and *Pitx3*-deficient embryos (Fig. 9B). Complete loss of *D2R* might be explained by its dependence on retinoic acid (RA) (Jacobs et al., 2011), because expression of the RA-synthesizing enzyme *Ahd2* is completely absent in *En1*<sup>-/-</sup> embryos, suggesting that both *D2R* and *Ahd2* are dependent on *En1* activity (Fig. 9A). This could also explain why *D2R* and *Ahd2* are the only DA-related genes not expanded into the *En1*-deficient metencephalon.

### The combined action of *En1* and *Pitx3* can be realized through at least three levels of molecular interaction

Our study indicates that *En1*-*Pitx3* crosstalk depends on at least three different mechanisms. First, *Pitx3* and *En1* influence each others' transcription [as shown by rostralateral downregulation of *Pitx3* in *En1*<sup>-/-</sup> embryos (Fig. 5A,D), and upregulation of *En1* in *Pitx3*<sup>-/-</sup> embryos (Jacobs et al., 2011)]. Second, modulation of

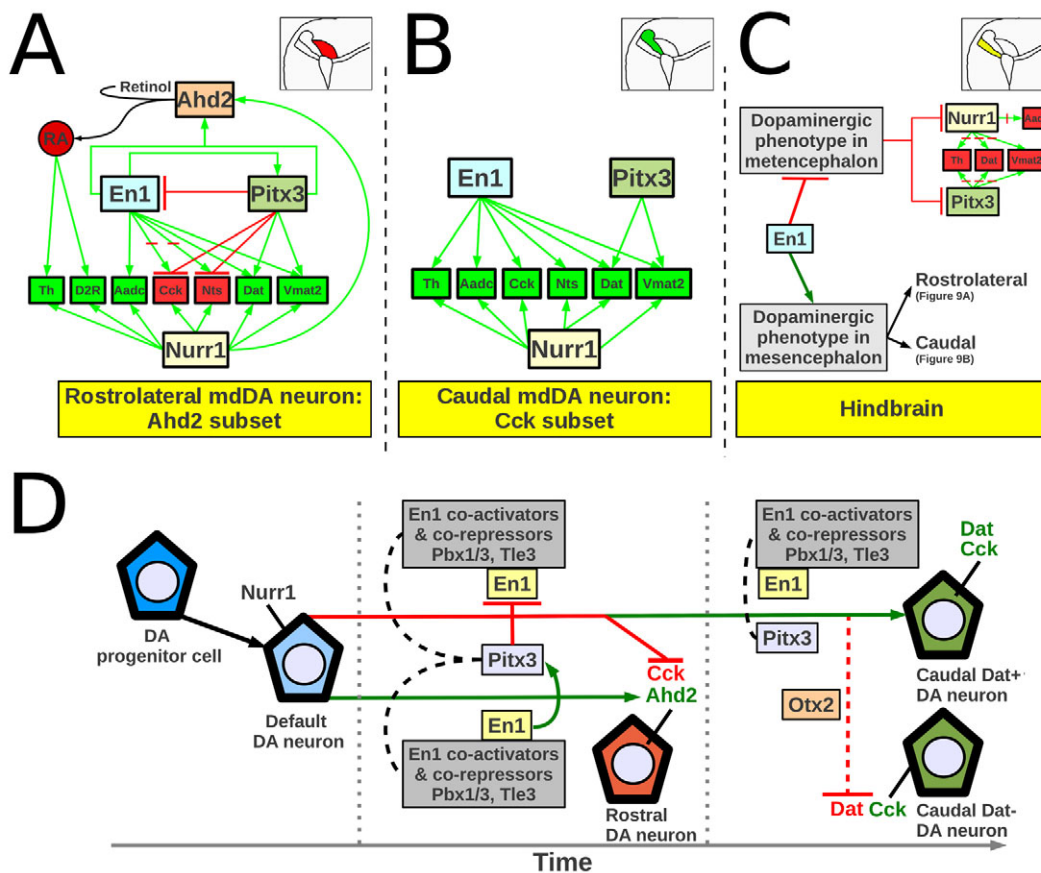

**Fig. 9. Model for interplay of *En1* and *Pitx3* in mdDA subset specification.** (A) *En1* and *Pitx3* cooperatively drive expression of the *Nurr1* target genes *Dat*, *Th* and *Ahd2* in a rostralateral subset of mdDA neurons (marked by *Ahd2*; red in schematic). *Aadc* is strictly dependent on *En1*. Local synthesis of RA is abrogated in *En1*<sup>-/-</sup> and *Pitx3*<sup>-/-</sup> embryos, contributing to rostralateral downregulation of *Th* and *D2R*. *Pitx3*, induced by *En1* in this subset, represses genes reciprocally regulated by *En1* and *Pitx3*, such as *Cck* and *Nts*, presumably by repression of *En1* or by modulating *En1* protein activity. (B) A second, caudal mdDA subset is marked by *Cck* (green in schematic), which is induced by *En1*. Other DA-related genes, such as *Th*, are regulated by both *En1* and *Pitx3*, which may compensate for each others' loss within this subset. (C) In the metencephalon (yellow in schematic), *En1* represses the mdDA fate. (D) Generation of mdDA subsets during terminal differentiation. After *Nurr1* induction, *Pitx3* and *En1* cooperate (sequentially, in concert or reciprocally) in mdDA subset specification. *Pitx3*, initially induced by *En1*, regulates transcription of genes encoding *En1* modulatory proteins (*Pbx1*, *Pbx3*, *Tle3*) and represses *En1* rostralaterally. Once the *Ahd2*<sup>+</sup> rostralateral mdDA subset is generated, *En1* induces the caudal (*Cck*<sup>+</sup>) DA phenotype. A subpopulation of *Cck*<sup>+</sup> mdDA neurons does not express *Dat*, possibly explained by *Otx2*-mediated antagonism (Di Salvio et al., 2010). Green, activation in wild type; red, repression in wild type; dashed black line, modulation in wild type; green arrows with red strike-through, activation inhibited in wild type; dashed red line, possible repressive mechanism.

transcriptional complex composition may be key. Re-activation of *Nurr1* target genes in *En1*<sup>-/-</sup> embryos by HDAC inhibition is analogous to the previously described upregulation of *Th* expression upon HDAC inhibition in *Pitx3*<sup>sgfp/-</sup> embryos (Jacobs et al., 2009a). *Pitx3* crucially influences N-CoR2(Smrt)–Sin3–HDAC-mediated repression of mdDA genes by recruitment of the *Nurr1*–PSF transcriptional complex and release of Smrt–HDAC complexes (Jacobs et al., 2009a; Van Heesbeen et al., 2013). It has been shown that the N-CoR–Sin3–HDAC complex can be recruited to the Engrailed homology 1 domain (Eh1) of *HesX1* (Dasen et al., 2001) and our finding that *En1* can directly interact with PSF suggests that *En1* releases HDAC-mediated repression in a similar manner to that described for *Pitx3*.

Whereas release of HDAC-mediated repression of *Nurr1/En1/Pitx3* target genes seems to be necessary for DA-related gene induction during terminal differentiation, *En1*-mediated repression might be crucial at earlier developmental stages to repress the mdDA phenotype in the metencephalon (Fig. 9C). During early pituitary development, *Hesx1*–HDAC repressive complexes define spatial domains in which pituitary organogenesis occurs by restriction and maintenance of the *Fgf8* expression domain (Dasen et al., 2001). *Fgf8* is crucial for proper positioning of the MHB (Smidt and Burbach, 2007; Joyner et al., 2000) and is regulated by *En1* (Shamim et al., 1999), and beads containing recombinant *Fgf8* induce ectopic midbrain formation (Martinez et al., 1999). Therefore, absence of *En1*–HDAC repressive complexes in the metencephalon of *En1*<sup>-/-</sup> embryos might result in ectopic induction of the DA phenotype by affecting the *Fgf8* expression domain.

A third mechanism of *Pitx3*–*En1* crosstalk is *Pitx3*-mediated regulation of genes encoding *En1* modulatory proteins. *En1* can act as a transcriptional activator or repressor, depending on its interactors at the Eh domain (Serrano and Maschat, 1998). We found that *Pitx3* activates *Pbx1*, *Pbx3* and *Tle3*, members of the Groucho (Grg/Tle) and Pbx family that bind Eh domains and thereby modulate *En1* transcriptional activity (Dasen et al., 2001). In agreement with our data, it was recently shown that *Pbx1* and *Pbx3* are enriched in *Pitx3*<sup>+</sup> mouse embryonic stem cells compared with *Pitx3*<sup>-</sup> cells (Ganat et al., 2012). In flies, *Engrailed* requires the Pbx ortholog *Exd* for activation of specific targets (Serrano and Maschat, 1998), and the murine Eh2 domain interacts with *Pbx* (Peltenburg and Murre, 1996). A role for *Pbx* in mdDA subset specification and differential regulation of *En1* target genes is supported by the finding that in zebrafish *Pbx* proteins cooperate with *Engrailed* proteins to compartmentalize the midbrain and the caudal expansion of diencephalic genes into midbrain territory in *Pbx*-null and *Engrailed*-null embryos (Erickson et al., 2007). Moreover, in mice, a role for *Pbx1* in mdDA neuron axonal pathfinding has been suggested (Sgadò et al., 2012). *Pbx* proteins are regulated transcriptionally and post-translationally by RA, which increases mRNA levels and extends protein half-lives, respectively (Qin et al., 2004). *Hox* and *Pbx* genes positively reinforce RA signaling by driving *Raldh2* (*Aldh1a2*) expression in the developing hindbrain in a feed-forward mechanism (Vitobello et al., 2011). Local RA synthesis is driven by *Ahd2* and is therefore restricted to the rostralateral mdDA area (Jacobs et al., 2007; Jacobs et al., 2011), suggesting that local RA synthesis reinforces the rostralateral mdDA phenotype. As *Ahd2* expression is *Pitx3* dose dependent (Jacobs et al., 2007), this might also explain the decreased lateral expression of *Pbx1* in *Pitx3*<sup>sgfp/+</sup> and the further downregulation in *Pitx3*<sup>sgfp/gfp</sup> embryos that we observed.

### How do *En1* and *Pitx3* interact in dopaminergic subset specification?

Our data allow us to model how *Nurr1*, *En1* and *Pitx3* interplay might generate different mdDA subsets, taking into account that the birth of rostralateral SNc neurons precedes that of caudal VTA neurons (Bye et al., 2012) (Fig. 9D). Initially, *Nurr1* activation generates default DA cells, which can still become caudal *Cck*<sup>+</sup> or rostralateral *Ahd2*<sup>+</sup> mdDA neurons. Subsequently, crosstalk between *Pitx3* and *En1* influences mdDA subset specification. Our data suggest that within the rostralateral mdDA region *En1* is initially required to drive *Pitx3* expression and induce the DA phenotype, as *Pitx3* and all analyzed DA neuron markers (except *Nurr1*) are downregulated within this domain in *En1*<sup>-/-</sup> embryos. Ectopic *Cck* expression in this subset in *Pitx3*<sup>-/-</sup> embryos (Jacobs et al., 2011) indicates that *Pitx3* antagonizes the caudal phenotype within this population, either by direct repression of *En1* or by regulation of genes encoding proteins that modulate *En1* transcriptional activity (*Pbx1/3* and *Tle3*). This complex interplay ultimately generates a rostralateral mdDA neuron, deprived of *Cck*, but expressing *Ahd2*, that is dependent on both *En1* (Fig. 5B,D) and *Pitx3* (Jacobs et al., 2007a).

After establishing the rostralateral phenotype, remaining default DA neurons adopt a caudal mdDA subset phenotype (*Cck*<sup>+</sup>). Unaffected expression of multiple DA neuron markers in the caudal area of *Pitx3*<sup>-/-</sup> embryos indicates that *En1* is crucial for induction of the caudal mdDA phenotype. This fate switch might be initiated by compositional changes in *En1*-containing complexes (e.g. *Pbx* or *Tle* recruitment or release). Notably, within the caudal *Cck*<sup>+</sup> population, we observed a neuronal subset that was *Cck*<sup>+</sup>, but *Dat*<sup>-</sup>. Possibly, *Dat* expression is antagonized in this subset by a third homeoprotein, *Otx2*, as described in adult (Di Salvio et al., 2010).

This model explains the mutant mice phenotypes. In *Pitx3*<sup>-/-</sup> embryos, the rostralateral phenotype cannot be initiated, but caudal mdDA neuron programming, mainly dependent on *En1*, can be activated, leading to ectopic *Cck* expression. These caudal neurons are destined to form the VTA, explaining why the VTA is relatively intact in adult *Pitx3*<sup>-/-</sup> mice (Smidt et al., 2004). In *En1*<sup>-/-</sup> embryos, by contrast, no active *En1* protein is present. Thus, not only is rostralateral mdDA neuron programming affected, but also the *Cck*<sup>+</sup> caudal DA phenotype cannot be induced, because *En1* is required for its induction. This ultimately leads to VTA and SNc defects in adult knockout mice.

### Final remarks

Our genome-wide and in-depth spatial expression analysis revealed multiple genes that are either mutually cooperative or reciprocally regulated by *En1* and *Pitx3*. Which of these are direct targets remains to be assessed, preferably by *in vivo* identification of *En1* and *Pitx3* binding sites (e.g. by ChIP-Seq analysis). Notwithstanding, we have shown that one crucial difference in the complex coding of different mdDA subsets is the crosstalk between *En1* and *Pitx3*, which has important implications for how we think of subset-specific degeneration (as observed in PD) and reprogramming strategies. In this regard, future studies could focus on the impact of the observed gene expression changes on DA neuron function and physiology. In this aspect, it is interesting to note that *Cck* has mainly been associated with VTA functions such as reward and addiction (Jayaraman et al., 1990; Rotzinger and Vaccarino, 2003) and that *Cck* can inhibit DA neurotransmission (Lane et al., 1987). Moreover, it has been shown that *Cck*-B receptor antagonists potentiate locomotor stimulatory effects of L-DOPA in MPTP-lesioned monkeys (Boyce et al., 1990), suggesting that

functional blockade of Cck relieves PD symptoms. By contrast, aldehyde dehydrogenase (dys)function, including *Ahd2*, has mainly been related to PD (Fitzmaurice et al., 2013; Grünblatt et al., 2010), probably for its important role in DA detoxification and/or RA production from vitamin A. In addition, *Ahd2/Aldh2* combined knockout mice display significant Th<sup>+</sup> neuron loss in the SNc, reduction of dopamine and metabolites in the striatum, and age-dependent deficits in motor performance, that can be alleviated by L-DOPA administration (Wey et al., 2012).

Given these important physiological and functional differences between *Ahd2* and *Cck* function in DA neurons, detailed understanding of *En1* and *Pitx3* in the differential coding of the *Ahd2*<sup>+</sup> and *Cck*<sup>+</sup> mdDA subsets is of crucial importance, and may hold translational value given the association of polymorphisms in *Pitx3* and *En1* with sporadic PD (Haubenberger et al., 2011).

#### Acknowledgements

We thank Emmeke Aarts for help with statistical analysis and Robert Post for technical assistance.

#### Funding

This work was supported by an Aard en Levenswetenschappen (ALW) grant [816.02.012 to M.P.S.] and by a VICI-ALW grant [865.09.002 to M.P.S.] from the Nederlandse Organisatie voor Wetenschappelijk Onderzoek (NWO).

#### Competing interests statement

The authors declare no competing financial interests.

#### Author contributions

J.V.V., M.T.M.A.d.S. and M.P.S. designed experiments. J.V.V., M.T.M.A.d.S., W.M.K., M.J.A.G.K. and M.P.S. analyzed data. J.V.V., M.T.M.A.d.S., W.M.K., L.v.O., J.L.L. and A.J.A.v.d.L. performed experiments. F.C.P.H. contributed tools. J.V.V., M.T.M.A.d.S. and M.P.S. wrote the paper.

#### Supplementary material

Supplementary material available online at <http://dev.biologists.org/lookup/suppl/doi:10.1242/dev.094565/-/DC1>

#### References

- Albéri, L., Sgadò, P. and Simon, H. H. (2004). Engrailed genes are cell-autonomously required to prevent apoptosis in mesencephalic dopaminergic neurons. *Development* **131**, 3229-3236.
- Alvarez-Fischer, D., Fuchs, J., Castagner, F., Stettler, O., Massiani-Beaudoin, O., Moya, K. L., Bouillot, C., Oertel, W. H., Lombès, A., Faigle, W. et al. (2011). Engrailed protects mouse midbrain dopaminergic neurons against mitochondrial complex I insults. *Nat. Neurosci.* **14**, 1260-1266.
- Arenas, E. (2010). Towards stem cell replacement therapies for Parkinson's disease. *Biochem. Biophys. Res. Commun.* **396**, 152-156.
- Barzilai, A. and Melamed, E. (2003). Molecular mechanisms of selective dopaminergic neuronal death in Parkinson's disease. *Trends Mol. Med.* **9**, 126-132.
- Bilovocky, N. A., Romito-DiGiacomo, R. R., Murcia, C. L., Maricich, S. M. and Herrup, K. (2003). Factors in the genetic background suppress the engrailed-1 cerebellar phenotype. *J. Neurosci.* **23**, 5105-5112.
- Boyce, S., Rupniak, N. M., Tye, S., Steventon, M. J. and Iversen, S. D. (1990). Modulatory role for CCK-B antagonists in Parkinson's disease. *Clin. Neuropharmacol.* **13**, 339-347.
- Bye, C. R., Thompson, L. H. and Parish, C. L. (2012). Birth dating of midbrain dopamine neurons identifies A9 enriched tissue for transplantation into parkinsonian mice. *Exp. Neurol.* **236**, 58-68.
- Caiazzo, M., Dell'Anno, M. T., Dvoretzskova, E., Lazarevic, D., Taverna, S., Leo, D., Sotnikova, T. D., Menegon, A., Roncaglia, P., Colciago, G. et al. (2011). Direct generation of functional dopaminergic neurons from mouse and human fibroblasts. *Nature* **476**, 224-227.
- Dasen, J. S., Martinez Barbera, J. P., Herman, T. S., Connell, S. O., Olson, L., Ju, B., Tollkuhn, J., Baek, S. H., Rose, D. W. and Rosenfeld, M. G. (2001). Temporal regulation of a paired-like homeodomain repressor/TLE corepressor complex and a related activator is required for pituitary organogenesis. *Genes Dev.* **15**, 3193-3207.
- Di Salvio, M., Di Giovannantonio, L. G., Acampora, D., Proserpio, R., Omodei, D., Prakash, N., Wurst, W. and Simeone, A. (2010). Otx2 controls neuron subtype identity in ventral tegmental area and antagonizes vulnerability to MPTP. *Nat. Neurosci.* **13**, 1481-1488.
- Erickson, T., Scholpp, S., Brand, M., Moens, C. B. and Waskiewicz, A. J. (2007). Pbx proteins cooperate with Engrailed to pattern the midbrain-hindbrain and diencephalic-mesencephalic boundaries. *Dev. Biol.* **301**, 504-517.
- Fitzmaurice, A. G., Rhodes, S. L., Lulla, A., Murphy, N. P., Lam, H. A., O'Donnell, K. C., Barnhill, L., Casida, J. E., Cockburn, M., Sagasti, A. et al. (2013). Aldehyde dehydrogenase inhibition as a pathogenic mechanism in Parkinson disease. *Proc. Natl. Acad. Sci. USA* **110**, 636-641.
- Gaillard, A. and Jaber, M. (2011). Rewiring the brain with cell transplantation in Parkinson's disease. *Trends Neurosci.* **34**, 124-133.
- Ganat, Y. M., Calder, E. L., Kriks, S., Nelander, J., Tu, E. Y., Jia, F., Battista, D., Harrison, N., Parmar, M., Tomishima, M. J. et al. (2012). Identification of embryonic stem cell-derived midbrain dopaminergic neurons for engraftment. *J. Clin. Invest.* **122**, 2928-2939.
- Grima, B., Lamouroux, A., Blanot, F., Biguet, N. F. and Mallet, J. (1985). Complete coding sequence of rat tyrosine hydroxylase mRNA. *Proc. Natl. Acad. Sci. USA* **82**, 617-621.
- Grünblatt, E., Zehetmayer, S., Jacob, C. P., Müller, T., Jost, W. H. and Riederer, P. (2010). Pilot study: peripheral biomarkers for diagnosing sporadic Parkinson's disease. *J. Neural Transm.* **117**, 1387-1393.
- Haubenberger, D., Reinthaler, E., Mueller, J. C., Pirker, W., Katzenschlager, R., Froehlich, R., Bruecke, T., Daniel, G., Auff, E. and Zimprich, A. (2011). Association of transcription factor polymorphisms PITX3 and EN1 with Parkinson's disease. *Neurobiol. Aging* **32**, 302-307.
- Hwang, D.-Y., Ardayfio, P., Kang, U. J., Semina, E. V. and Kim, K.-S. (2003). Selective loss of dopaminergic neurons in the substantia nigra of Pitx3-deficient aphakia mice. *Brain Res. Mol. Brain Res.* **114**, 123-131.
- Jacobs, F. M. J., Smits, S. M., Noorlander, C. W., von Oerthel, L., van der Linden, A. J. A., Burbach, J. P. H. and Smidt, M. P. (2007). Retinoic acid counteracts developmental defects in the substantia nigra caused by Pitx3 deficiency. *Development* **134**, 2673-2684.
- Jacobs, F. M. J., van Erp, S., van der Linden, A. J. A., von Oerthel, L., Burbach, J. P. H. and Smidt, M. P. (2009a). Pitx3 potentiates Nurr1 in dopamine neuron terminal differentiation through release of SMRT-mediated repression. *Development* **136**, 531-540.
- Jacobs, F. M. J., van der Linden, A. J. A., Wang, Y., von Oerthel, L., Sul, H. S., Burbach, J. P. H. and Smidt, M. P. (2009b). Identification of Dlk1, Ptpru and Klhl1 as novel Nurr1 target genes in meso-diencephalic dopamine neurons. *Development* **136**, 2363-2373.
- Jacobs, F. M. J., Veenvliet, J. V., Almirza, W. H., Hoekstra, E. J., von Oerthel, L., van der Linden, A. J. A., Neijts, R., Koerkamp, M. G., van Leenen, D., Holstege, F. C. P. et al. (2011). Retinoic acid-dependent and -independent gene-regulatory pathways of Pitx3 in meso-diencephalic dopaminergic neurons. *Development* **138**, 5213-5222.
- Jayaraman, A., Nishimori, T., Dobner, P. and Uhl, G. R. (1990). Cholecystokinin and neurotensin mRNAs are differentially expressed in subnuclei of the ventral tegmental area. *J. Comp. Neurol.* **296**, 291-302.
- Joyner, A. L., Liu, A. and Millet, S. (2000). Otx2, Gbx2 and Fgf8 interact to position and maintain a mid-hindbrain organizer. *Curr. Opin. Cell Biol.* **12**, 736-741.
- Kriks, S., Shim, J.-W., Piao, J., Ganat, Y. M., Wakeman, D. R., Xie, Z., Carrillo-Reid, L., Auyeung, G., Antonacci, C., Buch, A. et al. (2011). Dopamine neurons derived from human ES cells efficiently engraft in animal models of Parkinson's disease. *Nature* **480**, 547-551.
- Lane, R. F., Blaha, C. D. and Phillips, A. G. (1987). Cholecystokinin-induced inhibition of dopamine neurotransmission: comparison with chronic haloperidol treatment. *Prog. Neuropsychopharmacol. Biol. Psychiatry* **11**, 291-299.
- Martinez, S., Crossley, P. H., Cobos, I., Rubenstein, J. L. and Martin, G. R. (1999). FGF8 induces formation of an ectopic isthmoc organizer and isthmocerebellar development via a repressive effect on Otx2 expression. *Development* **126**, 1189-1200.
- Maxwell, S. L., Ho, H.-Y., Kuehner, E., Zhao, S. and Li, M. (2005). Pitx3 regulates tyrosine hydroxylase expression in the substantia nigra and identifies a subgroup of mesencephalic dopaminergic progenitor neurons during mouse development. *Dev. Biol.* **282**, 467-479.
- Nunes, I., Tovmasian, L. T., Silva, R. M., Burke, R. E. and Goff, S. P. (2003). Pitx3 is required for development of substantia nigra dopaminergic neurons. *Proc. Natl. Acad. Sci. USA* **100**, 4245-4250.
- Peltenburg, L. T. and Murre, C. (1996). Engrailed and Hox homeodomain proteins contain a related Pbx interaction motif that recognizes a common structure present in Pbx. *EMBO J.* **15**, 3385-3393.
- Qin, P., Haberbusch, J. M., Soprano, K. J. and Soprano, D. R. (2004). Retinoic acid regulates the expression of PBX1, PBX2, and PBX3 in P19 cells both transcriptionally and post-translationally. *J. Cell. Biochem.* **92**, 147-163.
- Roepman, P., Wessels, L. F. A., Kettelaar, J., Kemmeren, P., Miles, A. J., Lijnzaad, P., Tilanus, M. G. J., Koole, R., Hordijk, G.-J., van der Vliet, P. C. et al. (2005). An expression profile for diagnosis of lymph node metastases from primary head and neck squamous cell carcinomas. *Nat. Genet.* **37**, 182-186.

- Rotzinger, S. and Vaccarino, F. J. (2003). Cholecystokinin receptor subtypes: role in the modulation of anxiety-related and reward-related behaviours in animal models. *J. Psychiatry Neurosci.* **28**, 171-181.
- Saucedo-Cardenas, O., Quintana-Hau, J. D., Le, W. D., Smidt, M. P., Cox, J. J., De Mayo, F., Burbach, J. P. and Conneely, O. M. (1998). Nurr1 is essential for the induction of the dopaminergic phenotype and the survival of ventral mesencephalic late dopaminergic precursor neurons. *Proc. Natl. Acad. Sci. USA* **95**, 4013-4018.
- Serrano, N. and Maschat, F. (1998). Molecular mechanism of polyhomeotic activation by Engrailed. *EMBO J.* **17**, 3704-3713.
- Sgadò, P., Albéri, L., Gherbassi, D., Galasso, S. L., Ramakers, G. M. J., Alavian, K. N., Smidt, M. P., Dyck, R. H. and Simon, H. H. (2006). Slow progressive degeneration of nigral dopaminergic neurons in postnatal Engrailed mutant mice. *Proc. Natl. Acad. Sci. USA* **103**, 15242-15247.
- Sgadò, P., Ferretti, E., Grbec, D., Bozzi, Y. and Simon, H. H. (2012). The atypical homeoprotein Pbx1a participates in the axonal pathfinding of mesencephalic dopaminergic neurons. *Neural Dev.* **7**, 24.
- Shamim, H., Mahmood, R., Logan, C., Doherty, P., Lumsden, A. and Mason, I. (1999). Sequential roles for Fgf4, En1 and Fgf8 in specification and regionalisation of the midbrain. *Development* **126**, 945-959.
- Simon, H. H., Saueressig, H., Wurst, W., Goulding, M. D. and O'Leary, D. D. (2001). Fate of midbrain dopaminergic neurons controlled by the engrailed genes. *J. Neurosci.* **21**, 3126-3134.
- Simon, H. H., Bhatt, L., Gherbassi, D., Sgadò, P. and Alberí, L. (2003). Midbrain dopaminergic neurons: determination of their developmental fate by transcription factors. *Ann. New York Acad. Sci.* **991**, 36-47.
- Smidt, M. P. and Burbach, J. P. H. (2007). How to make a mesodiencephalic dopaminergic neuron. *Nat. Rev. Neurosci.* **8**, 21-32.
- Smidt, M. P., van Schaick, H. S., Lanctôt, C., Tremblay, J. J., Cox, J. J., van der Kleij, A. A., Wolterink, G., Drouin, J. and Burbach, J. P. (1997). A homeodomain gene Ptx3 has highly restricted brain expression in mesencephalic dopaminergic neurons. *Proc. Natl. Acad. Sci. USA* **94**, 13305-13310.
- Smidt, M. P., Smits, S. M., Bouwmeester, H., Hamers, F. P. T., van der Linden, A. J. A., Hellemons, A. J. C. G. M., Graw, J. and Burbach, J. P. H. (2004). Early developmental failure of substantia nigra dopamine neurons in mice lacking the homeodomain gene Ptx3. *Development* **131**, 1145-1155.
- Smits, S. M., Ponnio, T., Conneely, O. M., Burbach, J. P. H. and Smidt, M. P. (2003). Involvement of Nurr1 in specifying the neurotransmitter identity of ventral midbrain dopaminergic neurons. *Eur. J. Neurosci.* **18**, 1731-1738.
- Smits, S. M., Terwisscha van Scheltinga, A. F., van der Linden, A. J. A., Burbach, J. P. H. and Smidt, M. P. (2004). Species differences in brain pre-neurotensin/neuromedin N mRNA distribution: the expression pattern in mice resembles more closely that of primates than rats. *Brain Res. Mol. Brain Res.* **125**, 22-28.
- Smits, S. M., Burbach, J. P. H. and Smidt, M. P. (2006). Developmental origin and fate of meso-diencephalic dopamine neurons. *Prog. Neurobiol.* **78**, 1-16.
- Sonnier, L., Le Pen, G., Hartmann, A., Bizot, J.-C., Trovero, F., Krebs, M.-O. and Prochiantz, A. (2007). Progressive loss of dopaminergic neurons in the ventral midbrain of adult mice heterozygote for Engrailed1. *J. Neurosci.* **27**, 1063-1071.
- Toulouse, A. and Sullivan, A. M. (2008). Progress in Parkinson's disease—where do we stand? *Prog. Neurobiol.* **85**, 376-392.
- Van den Heuvel, D. M. A. and Pasterkamp, R. J. (2008). Getting connected in the dopamine system. *Prog. Neurobiol.* **85**, 75-93.
- van den Munckhof, P., Luk, K. C., Ste-Marie, L., Montgomery, J., Blanchet, P. J., Sadikot, A. F. and Drouin, J. (2003). Ptx3 is required for motor activity and for survival of a subset of midbrain dopaminergic neurons. *Development* **130**, 2535-2542.
- Van Heesbeen, H. J., Mesman, S., Veenfliet, J. V. and Smidt, M. P. (2013). Epigenetic mechanisms in the development and maintenance of dopaminergic neurons. *Development* **140**, 1159-1169.
- Vitobello, A., Ferretti, E., Lampe, X., Vilain, N., Ducret, S., Ori, M., Spetz, J.-F., Selleri, L. and Rijli, F. M. (2011). Hox and Pbx factors control retinoic acid synthesis during hindbrain segmentation. *Dev. Cell* **20**, 469-482.
- Wallén, A., Zetterström, R. H., Solomin, L., Arvidsson, M., Olson, L. and Perlmann, T. (1999). Fate of mesencephalic AHD2-expressing dopamine progenitor cells in NURR1 mutant mice. *Exp. Cell Res.* **253**, 737-746.
- Wey, M. C.-Y., Fernandez, E., Martinez, P. A., Sullivan, P., Goldstein, D. S. and Strong, R. (2012). Neurodegeneration and motor dysfunction in mice lacking cytosolic and mitochondrial aldehyde dehydrogenases: implications for Parkinson's disease. *PLoS ONE* **7**, e31522.
- Wu, H., Kerr, M., Cui, X. and Churchill, G. (2003). MAANOVA: a software package for the analysis of spotted cDNA microarray experiments. In *The Analysis of Gene Expression Data: Methods and Software*, pp. 313-341. Springer.
- Wurst, W., Auerbach, A. B. and Joyner, A. L. (1994). Multiple developmental defects in Engrailed-1 mutant mice: an early mid-hindbrain deletion and patterning defects in forelimbs and sternum. *Development* **120**, 2065-2075.
- Zetterström, R. H., Solomin, L., Jansson, L., Hoffer, B. J., Olson, L. and Perlmann, T. (1997). Dopamine neuron agenesis in Nurr1-deficient mice. *Science* **276**, 248-250.
- Zhao, S., Maxwell, S., Jimenez-Beristain, A., Vives, J., Kuehner, E., Zhao, J., O'Brien, C., de Felipe, C., Semina, E. and Li, M. (2004). Generation of embryonic stem cells and transgenic mice expressing green fluorescence protein in midbrain dopaminergic neurons. *Eur. J. Neurosci.* **19**, 1133-1140.
